# Supplementary material for: Numerical assessment of the barrier integrity for a generic nuclear waste repository in crystalline rock
Source: Copernicus journal article supplement (doi:10.5194/sand-2-115-2023), 2023-09-06

Supplement of Saf. Nucl. Waste Disposal, 2, 115–115, 2023  
<https://doi.org/10.5194/sand-2-115-2023-supplement>  
© Author(s) 2023. CC BY 4.0 License.

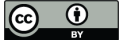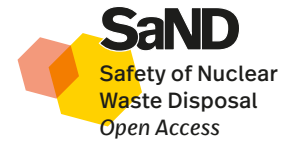

*Supplement of*

## **Numerical assessment of the barrier integrity for a generic nuclear waste repository in crystalline rock**

**Carlos Guevara Morel et al.**

*Correspondence to:* Carlos Guevara Morel ([carlos.guevaramorel@bgr.de](mailto:carlos.guevaramorel@bgr.de))

The copyright of individual parts of the supplement might differ from the article licence.



# Numerical assessment of the barrier integrity for a generic nuclear waste repository in crystalline rock

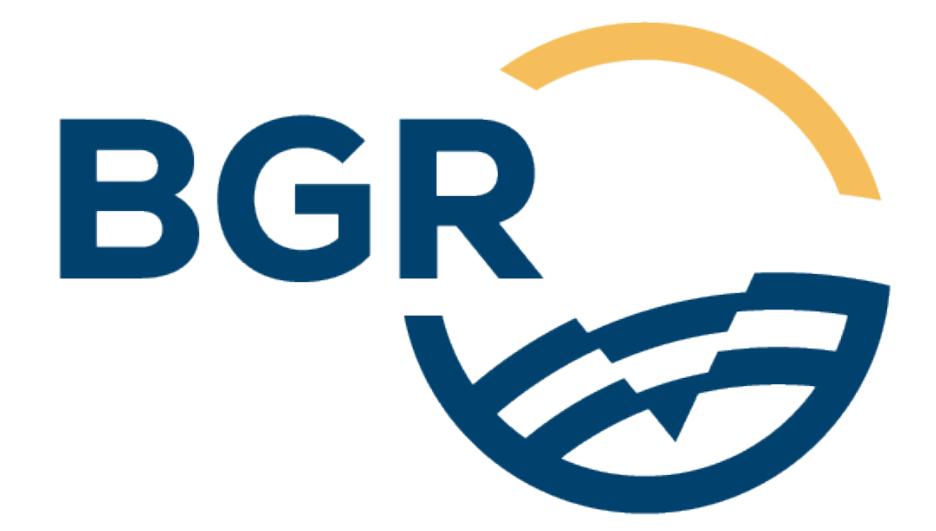

Bundesanstalt für Geowissenschaften und Rohstoffe

Carlos Guevara Morel, Jobst Maßmann, Georgios Maniatis, Jan Thiedau  
Federal Institute for Geosciences and Natural Resources- BGR, Hannover, Germany

## Motivation

In the CHRISTA [6] project, a numerical modeling concept for the assessment of barrier integrity of a generic nuclear waste repository in crystalline rock was developed. The concept is based on coupled thermo-hydro-mechanical (THM) simulations done with the open-source finite element software OpenGeoSys (OGS) [3] using the geological model described in [4] and the multiple containment providing rock zone (mCRZ) concept.

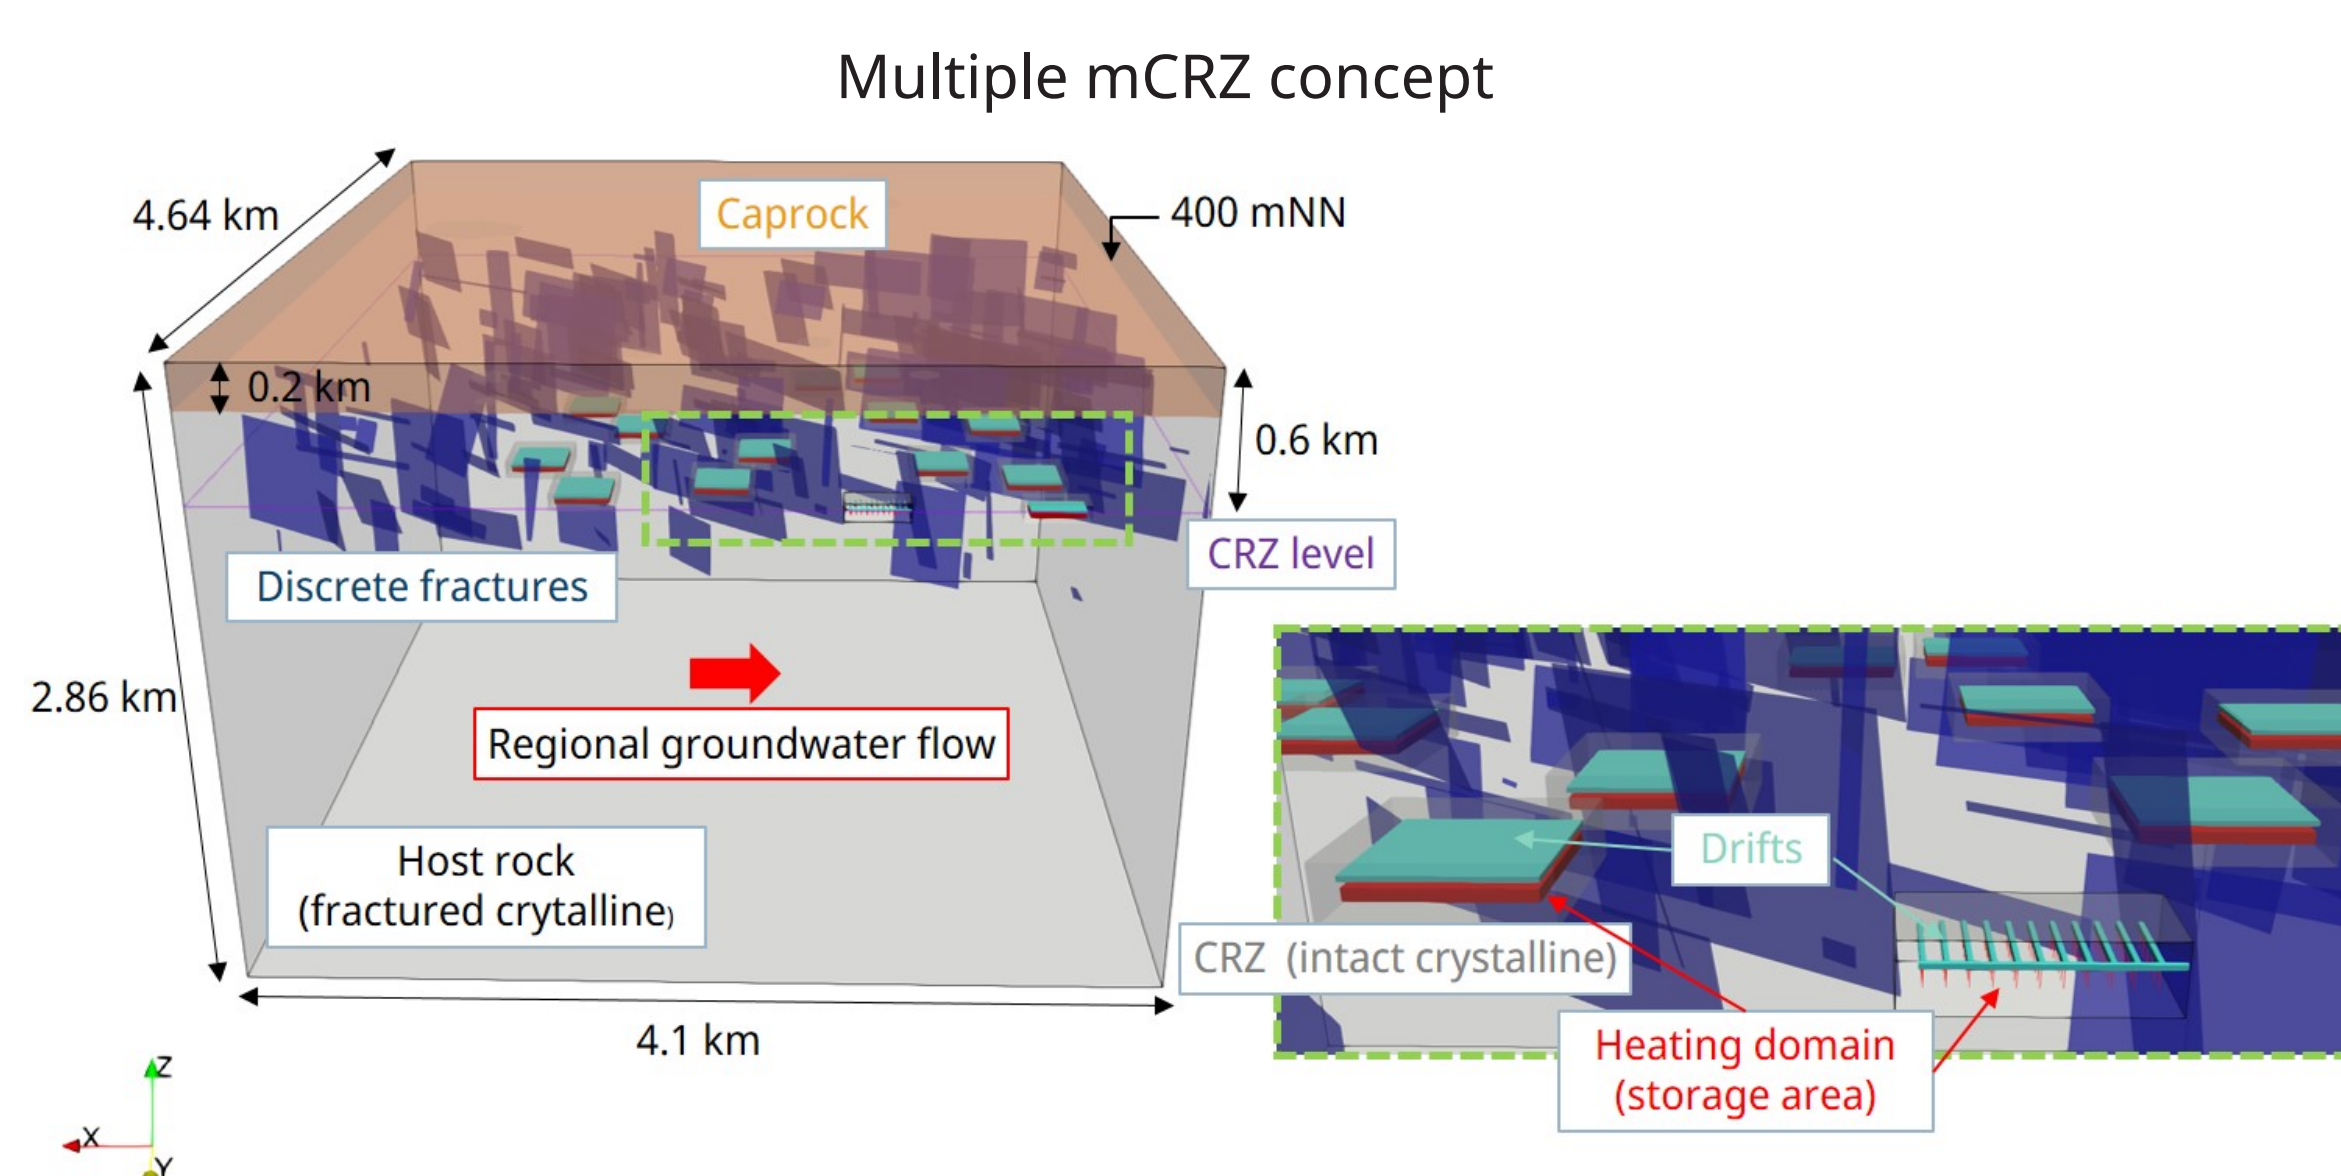

## Integrity analysis

- Flow is strongly dominated by the fractures
- Ratio  $\frac{V_{fracture}}{V_{matrix}} \approx 1e5$

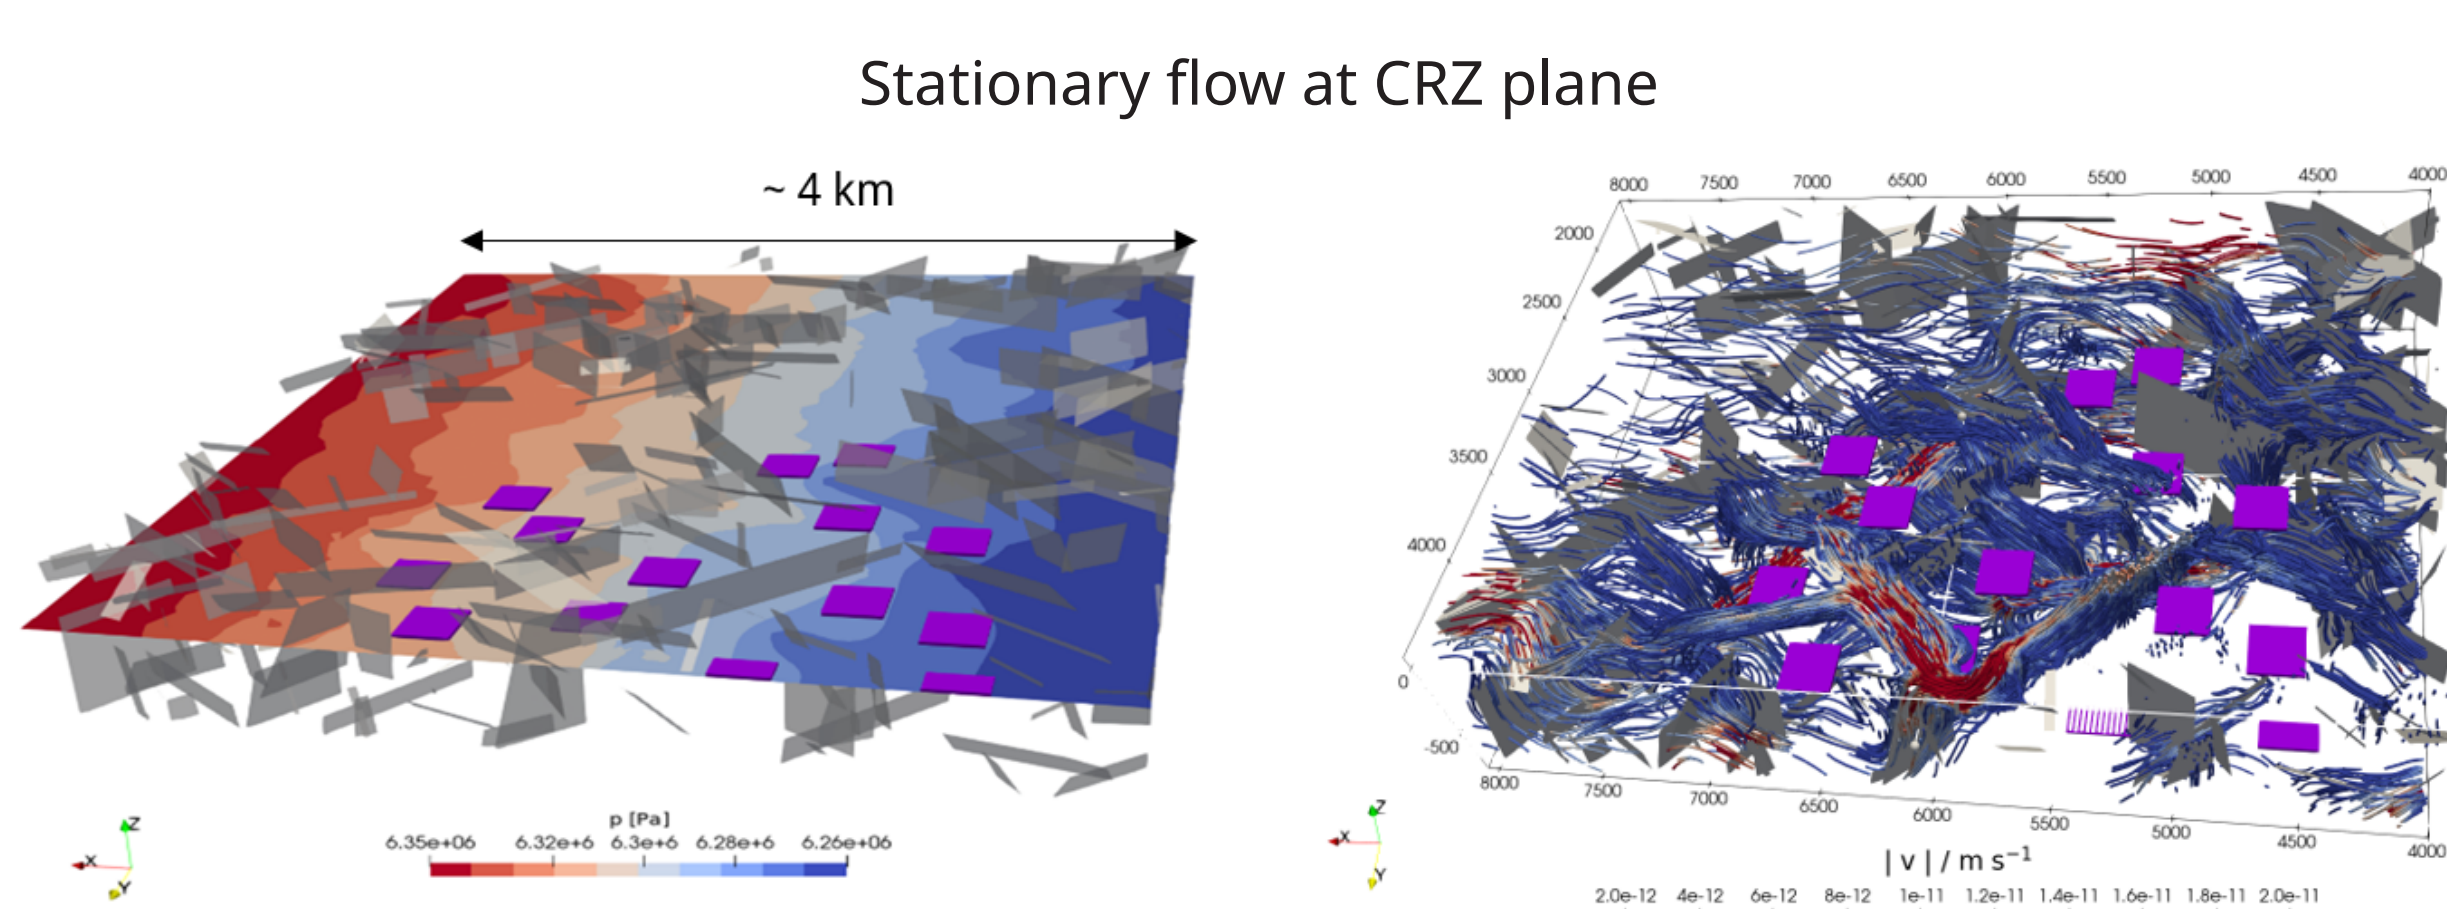

- Decay heat from radioactive waste
- Imposed heat source at heating domain (storage area)

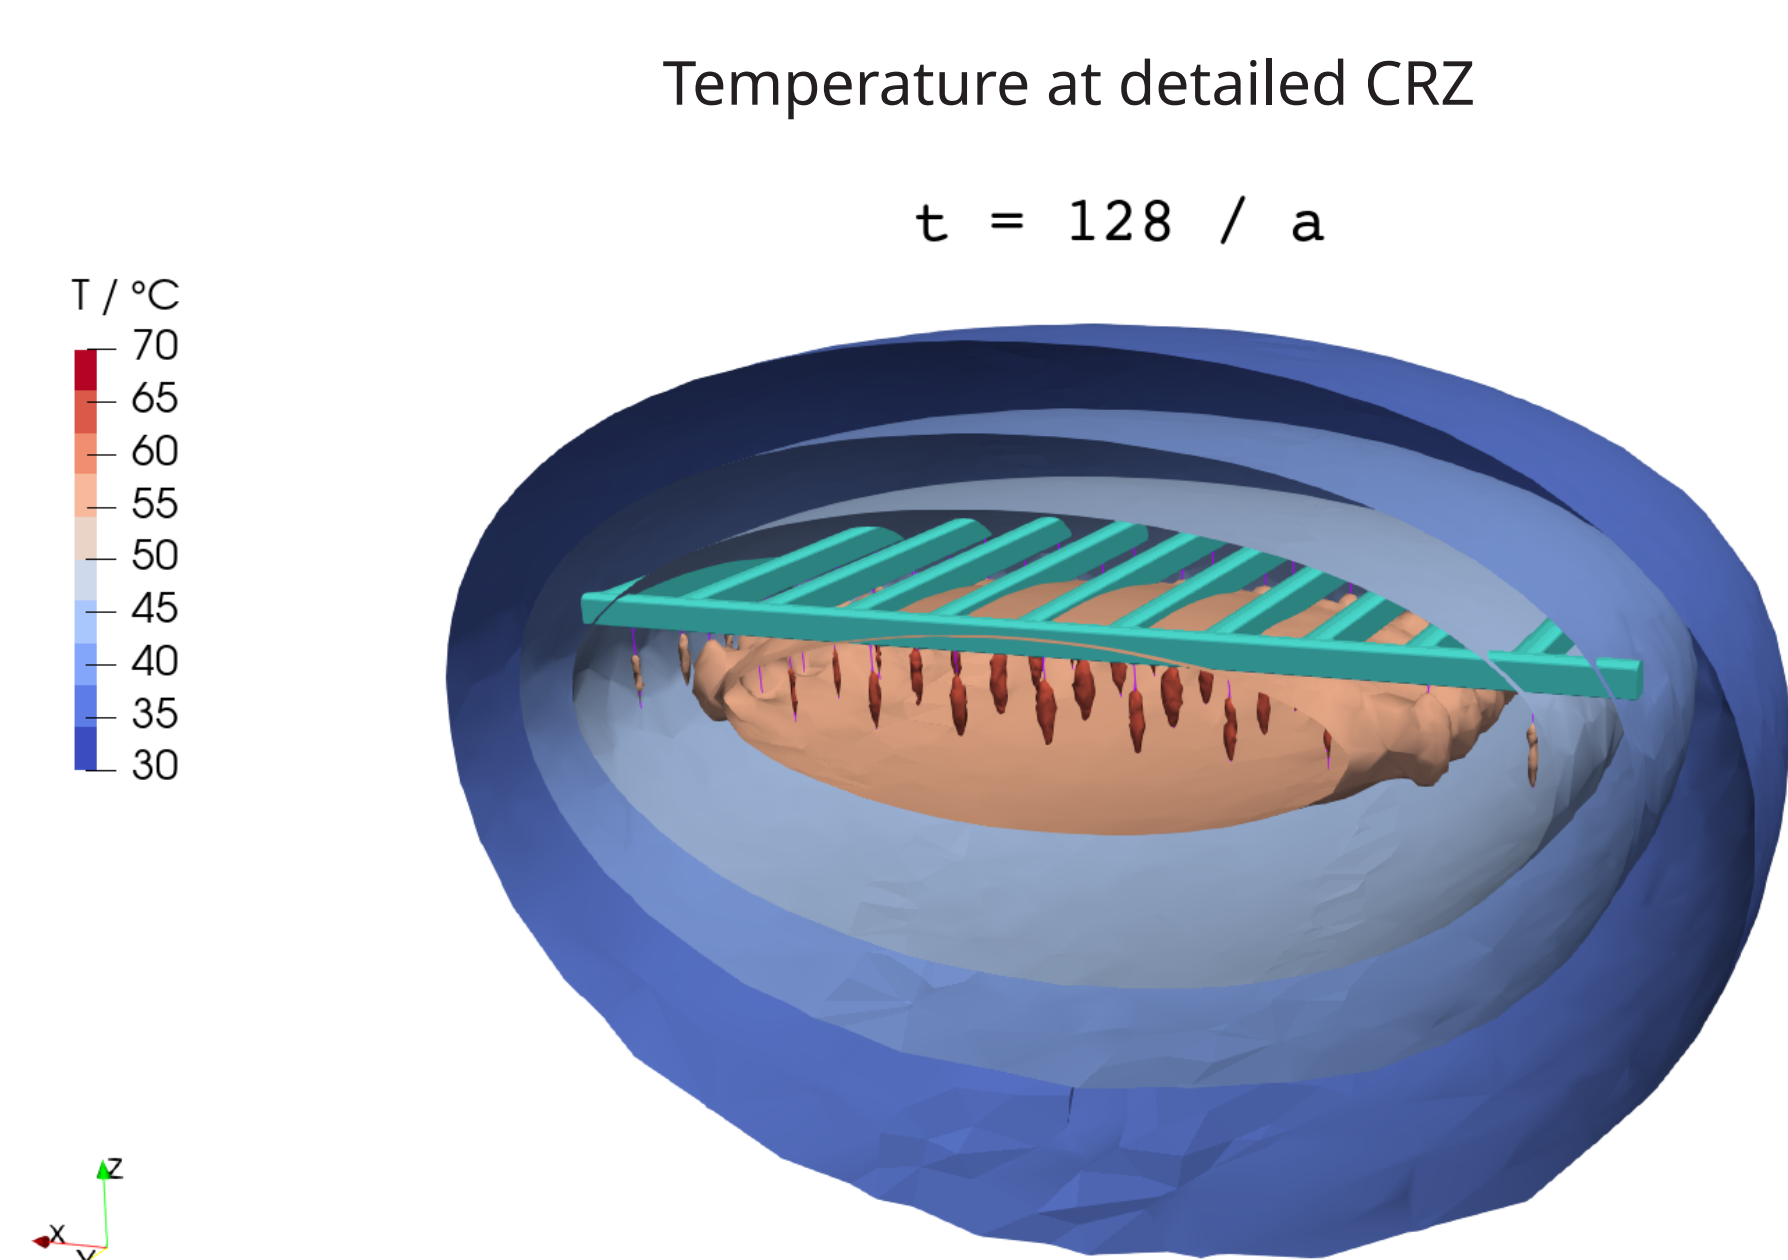

- Temperature criteria with  $T_{limit} = 100 \text{ °C}$  (left)
- Dilatancy criteria according to Hoek-Brown (right)

Evaluation of the integrity criteria at detailed CRZ

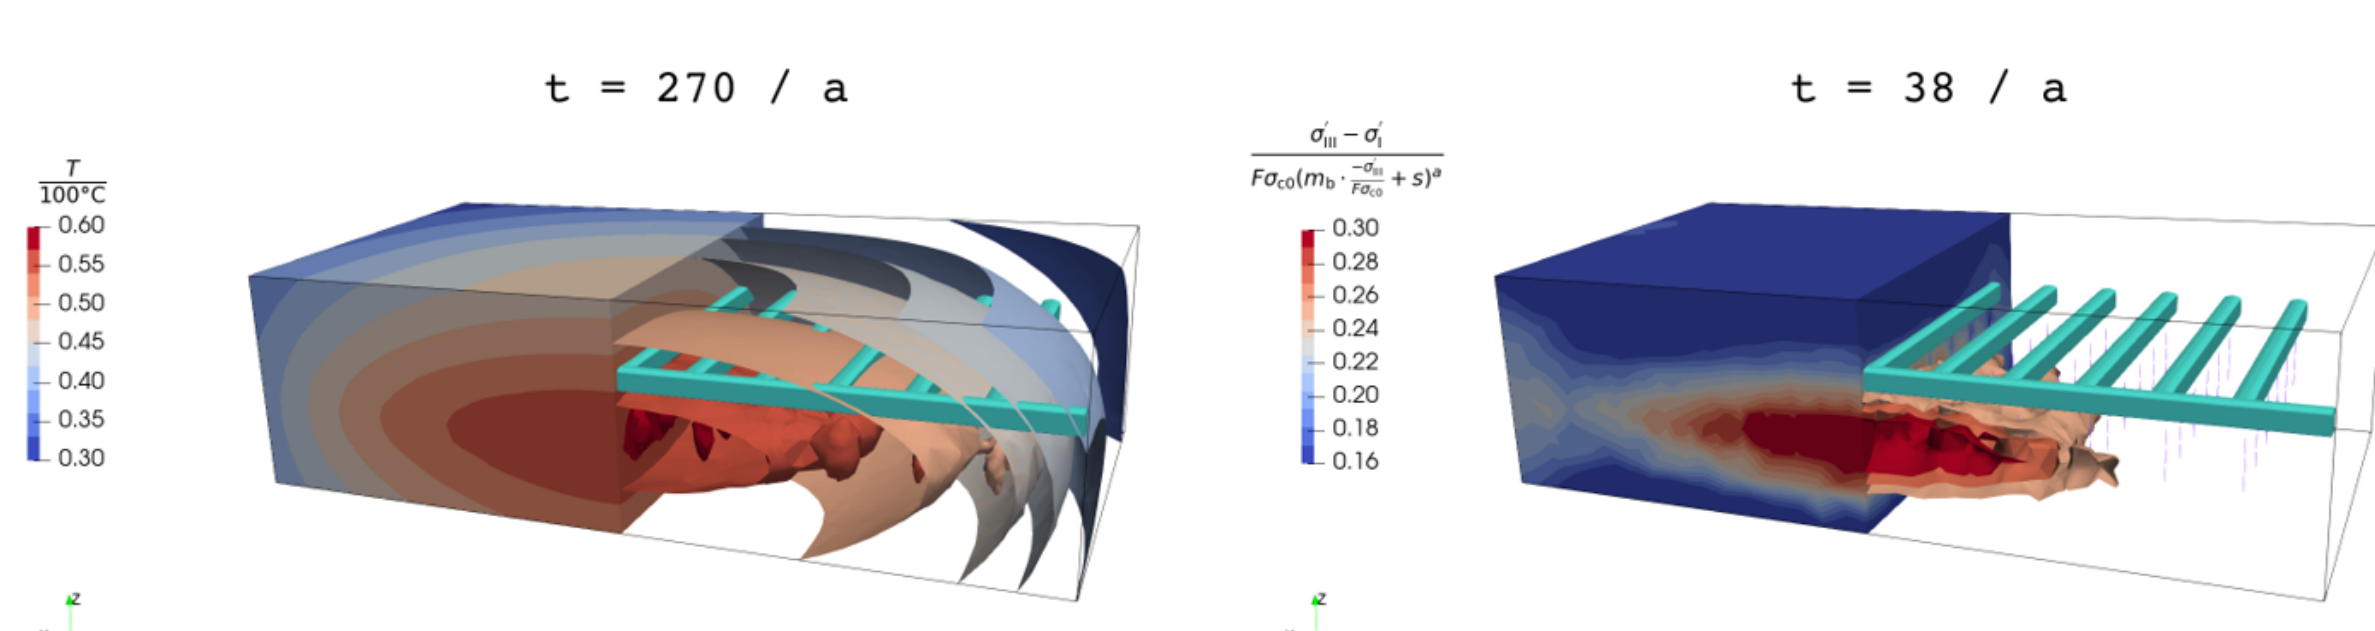

## What can a characterization of the jointed rock mass tell us about the feasibility of the mCRZ concept?

- Jointed rock mass properties (e.g. fracture orientation, length, density, etc.) are assumed to be known
- Rock properties used for the creation of a DFN

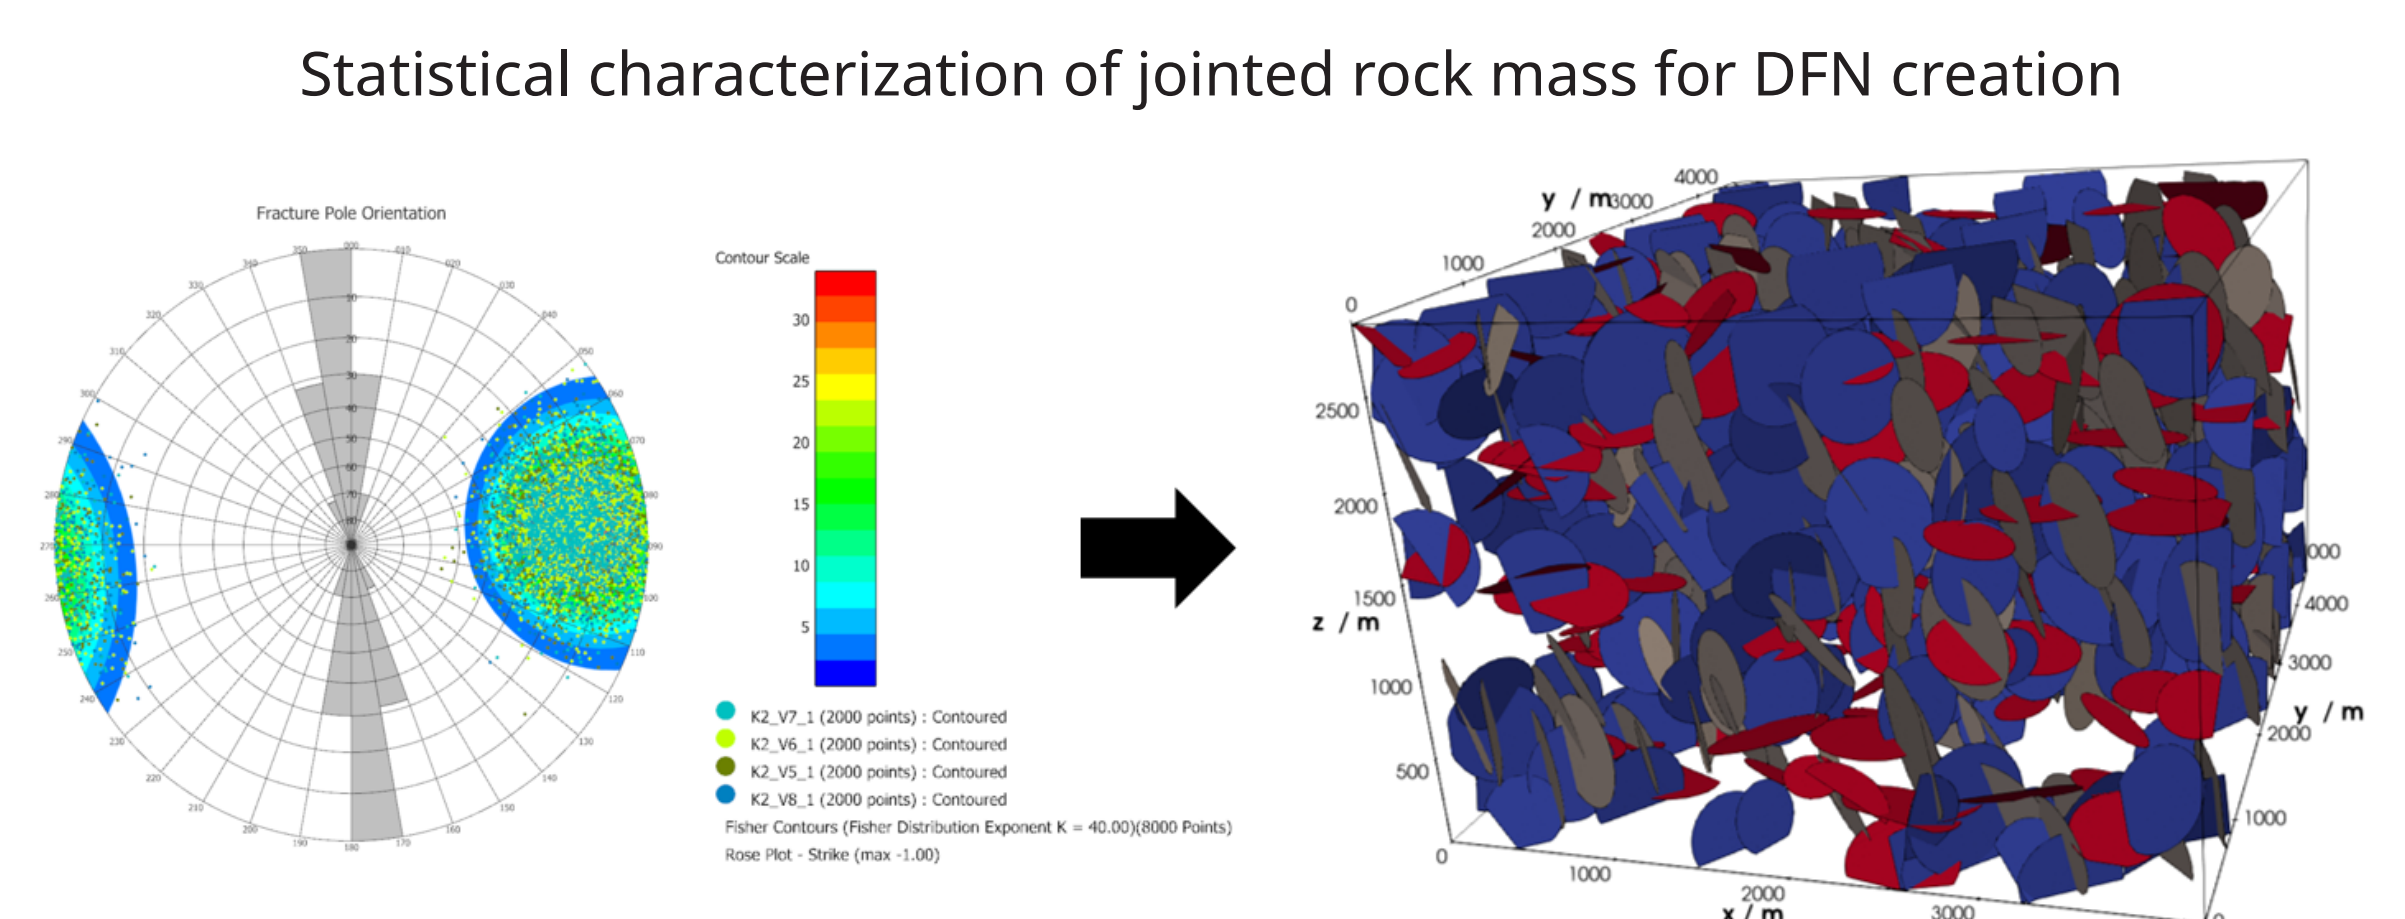

- Intersection of discontinuities creates blocks of intact rock masses with variable 3D geometry [2]
- Using one realization of a DFN, based on the model from [4], intact rock blocks were created using the rock slicing method [1, 5]

Workflow: from jointed rock characterization to blocks for CRZ emplacement

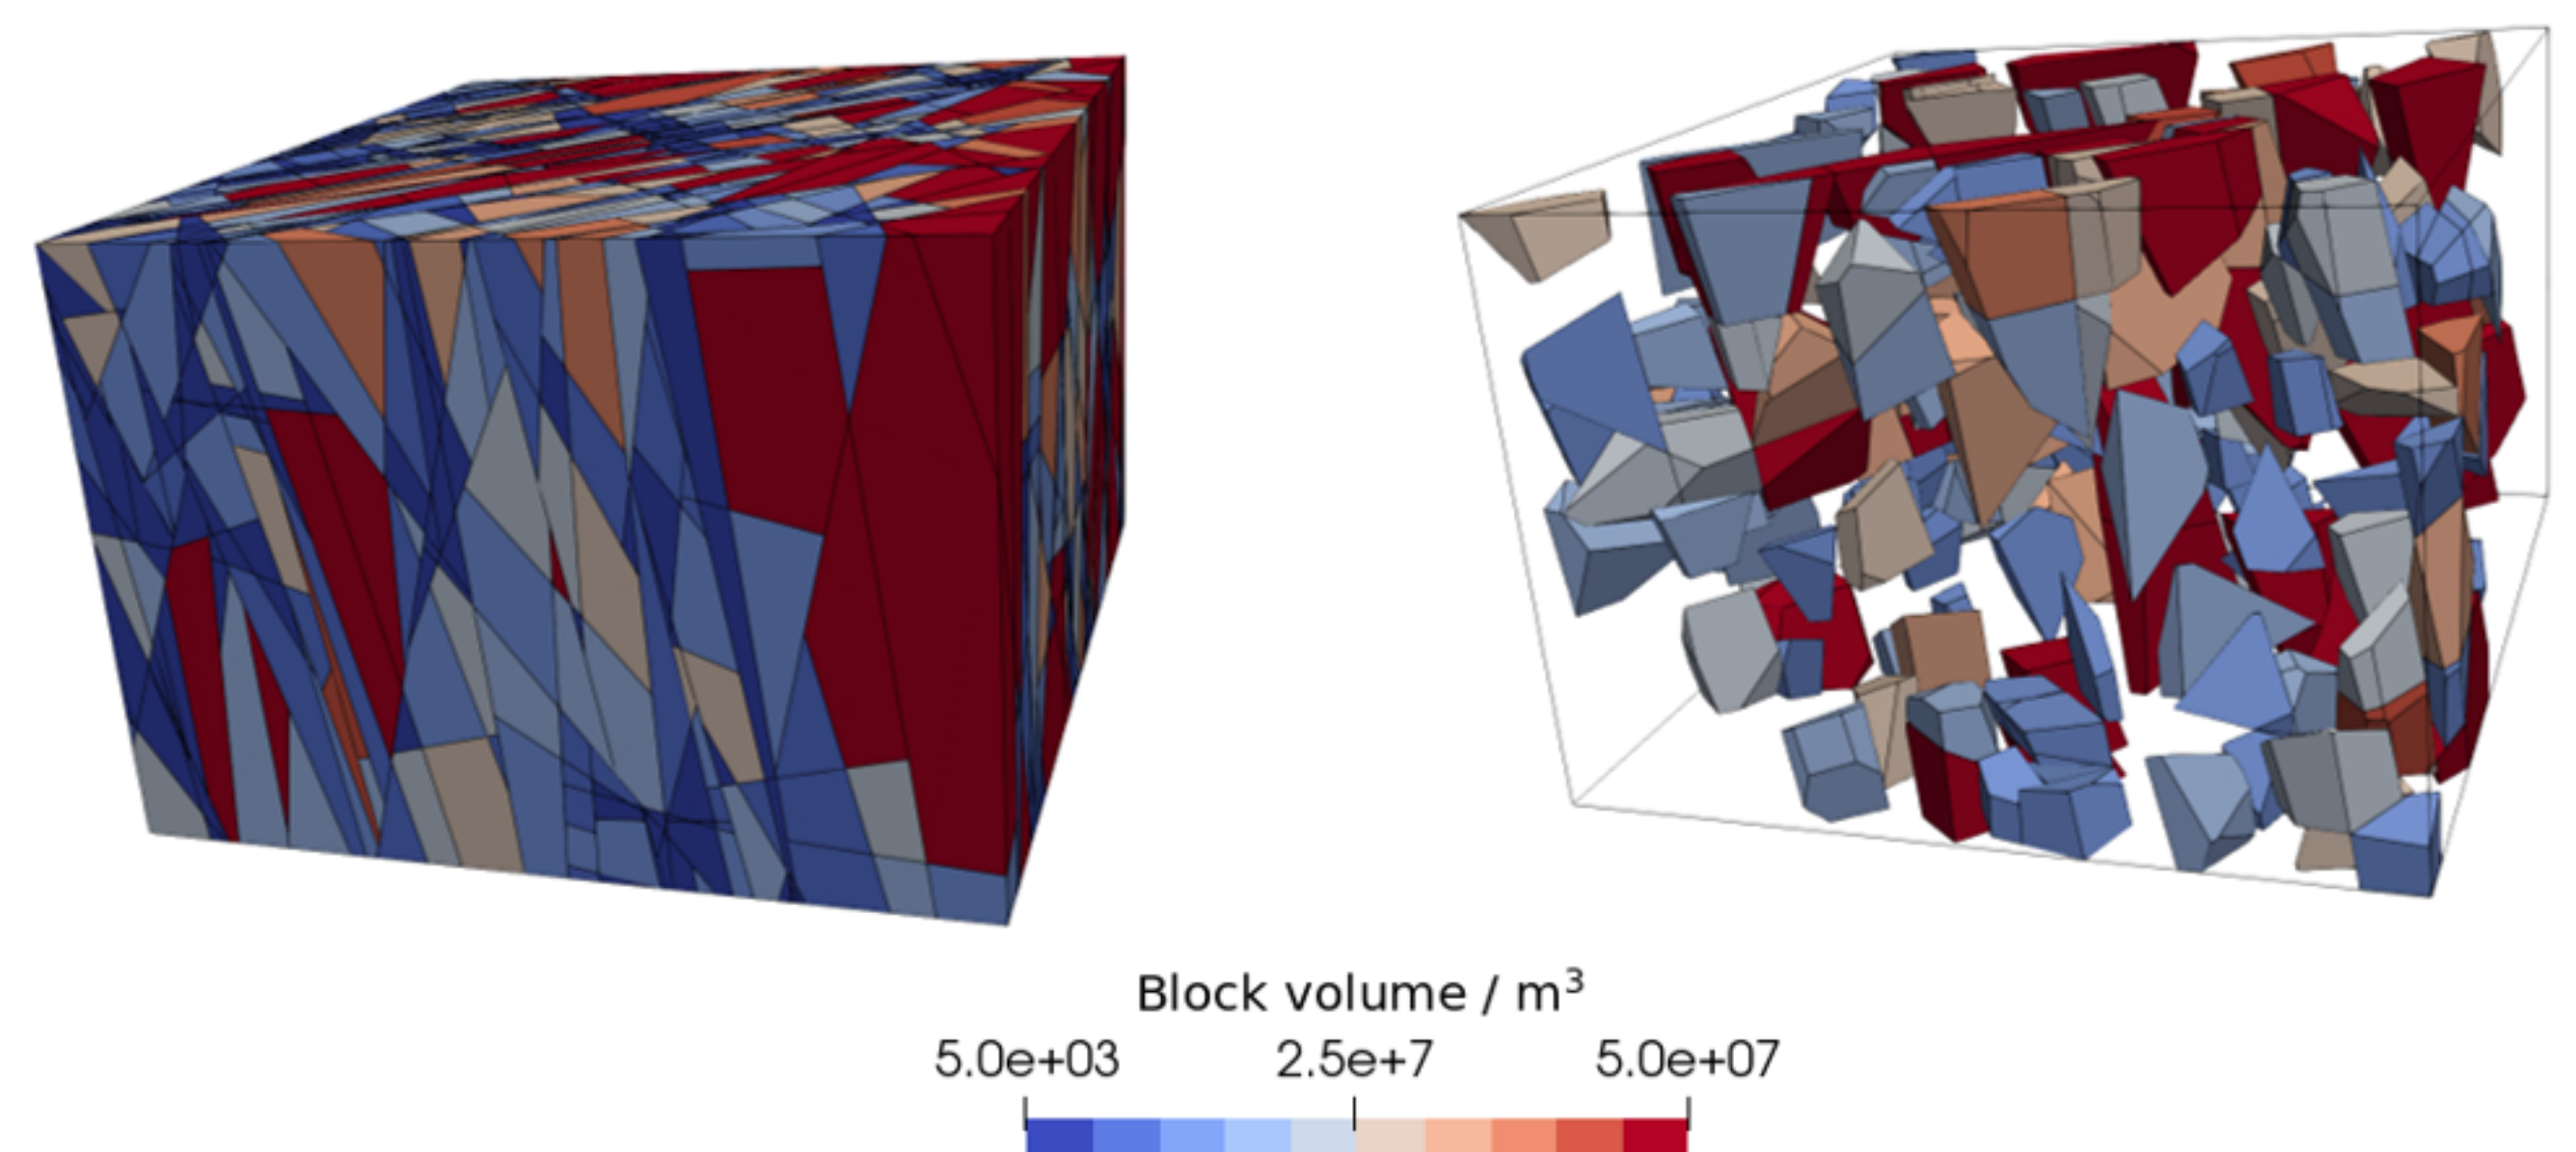

The proposed concept can help among others with the following aspects:

- Geometrical block filtering
- Quantification of the amount of blocks for the mCRZ emplacement

## References

- [1] C. Boon, G. Housby, and S. Utili. A new rock slicing method based on linear programming. *Computers and Geotechnics*, 65:12–29, 2015.
- [2] K. S. Kalenchuk, M. S. Diederichs, and S. McKinnon. Characterizing block geometry in jointed rockmasses. *International Journal of Rock Mechanics and Mining Sciences*, 43(8):1212–1225, 2006.
- [3] O. Kolditz, S. Bauer, L. Bilke, N. Böttcher, J. O. Delfs, T. Fischer, U. J. Görke, T. Kalbacher, G. Kosakowski, C. I. McDermott, C. H. Park, F. Radu, K. Rink, H. Shao, H. B. Shao, F. Sun, Y. Y. Sun, A. K. Singh, J. Taron, M. Walther, W. Wang, N. Watanabe, Y. Wu, M. Xie, W. Xu, and B. Zehner. OpenGeoSys: an open-source initiative for numerical simulation of thermo-hydro-mechanical/chemical (THM/C) processes in porous media. *Environmental Earth Sciences*, 67(2):589 – 599, 2012.
- [4] S. Mrugalla, B. Frenzel, M. Krumbholz, J. Sönneke, L. Stark, and A. Weitkamp. CHRISTA-II – Beschreibung der generischen geologischen Modelle für die Endlagersysteme "multipler ewG" und "mKBS-3". Ergebnisbericht, BGR, Hannover, 2020.
- [5] L. L. Rasmussen. Unblocksgen: A python library for 3d rock mass generation and analysis. *SoftwareX*, 12:100577, 2020.
- [6] J. Thiedau, J. Maßmann, C. Guevara Morel, S. Weihmann, and A. Alferra. CHRISTA-II - Analysen zur Integrität von geologischen Barrieren von Endlagersystemen im Kristallin. Ergebnisbericht, Hannover: BGR, 2021.

## Project partners

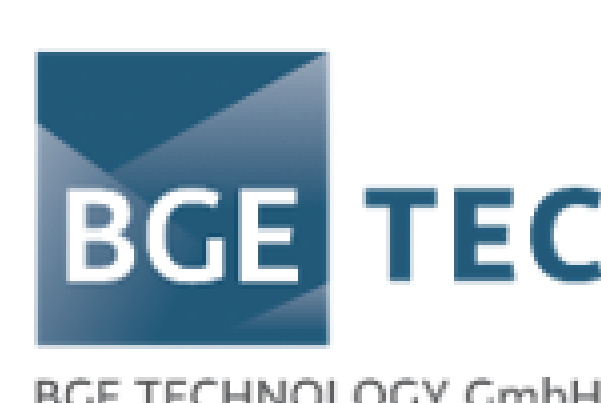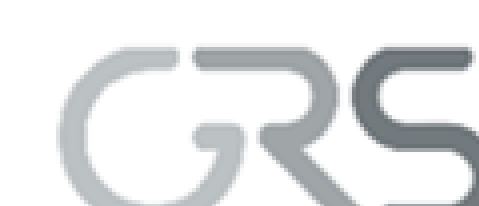

Supplement: Supplementary file 1 [file sand-2-115-2023-supplement.pdf]
